# Supplementary material for: Coupling among Microbial Communities, Biogeochemistry, and Mineralogy across Biogeochemical Facies
Source: PubMed Central journal article supplement (PMC4965824; doi:10.1038/srep30553), 2016-07-29

**Coupling among Microbial Communities, Biogeochemistry, and Mineralogy across  
Biogeochemical Facies**

James C. Stegen<sup>1,\*</sup>, Allan Konopka<sup>1</sup>, James P. McKinley<sup>1</sup>, Chris Murray<sup>1</sup>, Xueju Lin<sup>1</sup>,  
Micah D. Miller<sup>1</sup>, David W. Kennedy<sup>1</sup>, Erin A. Miller<sup>1</sup>, Charles T. Resch<sup>1</sup>, and Jim K.  
Fredrickson<sup>1</sup>

<sup>1</sup>Pacific Northwest National Laboratory, Richland, WA, USA

\*Corresponding Author: James Stegen, Phone (509) 371-6763; Fax (509) 371-6955

E-mail: [james.stegen@pnnl.gov](mailto:james.stegen@pnnl.gov)

## Supplemental Tables and Figures

**Table S1.** Physical pore structure as determined by X-ray tomography across wells and elevations (El., m). RF = reactive facies, Norm. Euler = normalized Euler, Surf. Area = surface area per volume, Frag. Index = fragmentation index, Lin. Den. = linear density.

| Well  | El., m | RF | Porosity | Tortuosity | Norm. Euler | Surf. Area | Frag. Index | Lin. Den. |
|-------|--------|----|----------|------------|-------------|------------|-------------|-----------|
| C7870 | 98.1   | O  | 0.316    | 4.385      | 0.000504    | 1.09E-05   | 11.699      | 0.476     |
| C7870 | 97.7   | O  | 0.053    | 8.565      | 0.000409    | 3.29E-06   | 19.101      | 0.144     |
| C7870 | 97.4   | T  | 0.036    | 20.816     | 1.26E-05    | 2.01E-07   | 21.54       | 0.009     |
| C7870 | 96.9   | R  | 0.112    | 10.154     | 0.000229    | 3.62E-06   | 15.051      | 0.159     |
| C7870 | 96.6   | R  | 0.204    | 6.312      | 0.000299    | 4.23E-06   | 17.202      | 0.186     |
| C7869 | 100.7  | T  | 0.159    | 3.108      | 0.00097     | 1.91E-05   | 6.077       | 0.836     |
| C7869 | 100.1  | R  | 0.065    | 8.34       | 0.000154    | 4.22E-06   | 17.984      | 0.185     |
| C7869 | 98.8   | R  | 0.1      | 4.798      | 5.48E-05    | 3.11E-06   | 15.031      | 0.137     |
| C7868 | 97.7   | O  | 0.028    | 7.556      | 0.00105     | 1.23E-05   | 12.867      | 0.541     |
| C7868 | 97.4   | T  | 0.332    | 3.639      | 0.000248    | 8.76E-06   | 15.447      | 0.372     |
| C7868 | 96.8   | R  | 0.266    | 2.578      | 6.74E-05    | 4.24E-06   | 13.181      | 0.186     |
| C7867 | 97.2   | O  | 0.207    | 6.447      | 0.000167    | 3.81E-06   | 16.012      | 0.167     |
| C7867 | 96.0   | O  | 0.021    | 9.336      | 0.000569    | 5.43E-06   | 20.064      | 0.238     |
| C7867 | 95.4   | O  | 0.135    | 6.759      | 0.000331    | 5.41E-06   | 17.92       | 0.237     |
| C7867 | 94.8   | T  | 0.08     | 8.986      | 0.000141    | 1.92E-06   | 23.6        | 0.084     |
| C7867 | 94.2   | R  | 0.03     | 22.612     | 0.000127    | 1.29E-06   | 22.222      | 0.056     |
| C7867 | 93.6   | R  | 0.09     | 4.794      | 0.000569    | 1.19E-05   | 12.134      | 0.521     |

**Table S2.** Mineralogy—as percent by volume—of Ringold sediments across wells and elevations (El., m) as determined by Rietveld refinement of X-ray diffraction results. RF = reactive facies, Qtz =quartz, Ab =albite, Ancl =anorthoclase, Mont = montmorillonite, Heul = heulandite, Clcl = chlinochlore, Hbd = hornblende, Amor = amorphous.

| Well  | El., m | RF | Qtz  | Ab   | Ancl | Mica | Mont | Heul | Clcl | Hbd | Amor |
|-------|--------|----|------|------|------|------|------|------|------|-----|------|
| C7870 | 98.1   | O  | 21.6 | 18.0 | 11.1 | 9.0  | 8.2  | 2.7  | 2.4  | 1.0 | 26.0 |
| C7870 | 97.7   | O  | 23.1 | 12.5 | 9.7  | 8.8  | 9.5  | 4.6  | 3.5  | 0.7 | 27.5 |
| C7870 | 97.4   | T  | 19.9 | 13.5 | 14.4 | 9.2  | 8.2  | 3.0  | 3.8  | 0.0 | 28.0 |
| C7870 | 96.9   | R  | 20.0 | 17.2 | 5.9  | 7.8  | 7.6  | 3.0  | 5.2  | 0.5 | 32.9 |
| C7870 | 96.6   | R  | 21.6 | 11.4 | 9.7  | 11.3 | 8.0  | 3.0  | 5.1  | 0.9 | 28.9 |
| C7869 | 100.7  | T  | 24.7 | 11.6 | 14.2 | 10.2 | 7.1  | 12.2 | 3.7  | 2.0 | 14.4 |
| C7869 | 100.1  | R  | 18.3 | 13.1 | 11.4 | 11.5 | 10.4 | 5.9  | 4.4  | 1.3 | 23.7 |
| C7869 | 98.8   | R  | 18.3 | 11.0 | 10.5 | 7.9  | 8.5  | 6.0  | 4.5  | 0.5 | 32.9 |
| C7868 | 97.7   | O  | 25.7 | 9.7  | 13.7 | 8.0  | 7.1  | 3.1  | 3.3  | 1.1 | 28.2 |
| C7868 | 97.4   | T  | 20.3 | 12.0 | 13.4 | 9.5  | 8.2  | 4.4  | 3.1  | 0.5 | 28.6 |
| C7868 | 96.8   | R  | 28.4 | 14.8 | 14.2 | 6.1  | 4.2  | 7.8  | 4.9  | 1.8 | 17.8 |
| C7867 | 97.2   | O  | 21.4 | 7.8  | 20.1 | 9.4  | 7.5  | 8.1  | 2.9  | 1.8 | 20.9 |
| C7867 | 96.0   | O  | 23.5 | 20.0 | 17.8 | 8.2  | 6.9  | 7.0  | 2.5  | 0.9 | 13.4 |
| C7867 | 95.4   | O  | 22.7 | 19.3 | 21.1 | 8.0  | 7.9  | 6.7  | 3.5  | 1.1 | 9.8  |
| C7867 | 94.8   | T  | 25.3 | 11.0 | 19.1 | 7.2  | 5.1  | 7.0  | 3.8  | 0.2 | 21.5 |
| C7867 | 93.6   | R  | 29.4 | 14.2 | 13.7 | 4.8  | 4.4  | 3.2  | 2.1  | 1.3 | 27.0 |

**Figure S1.** Representative example of Rietveld refinement of X-ray diffraction data for Ringold sediment sample. Data shown are from Well C7867 at elevation 96.0 m. Peaks attributed as follows: mon = montmorillonite, mic = mica, heu = heulandite, hor = hornblende, f = feldspar, q = quartz, z = zincite (internal standard).

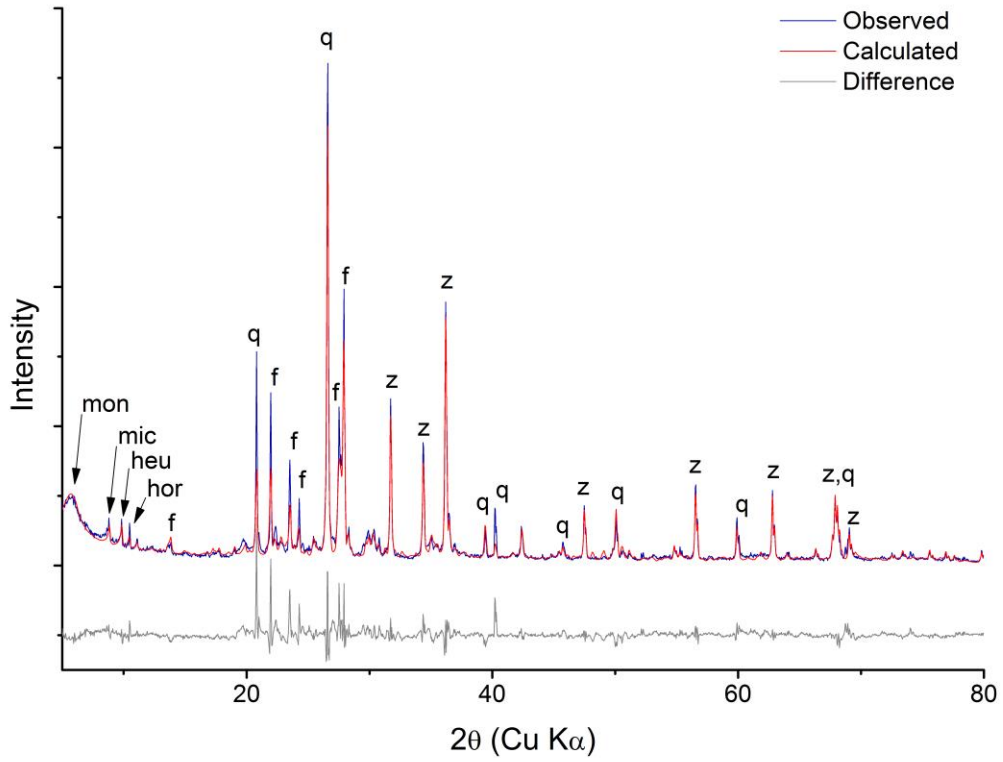

**Figure S2.** Boxplots of Fe(II) concentration and pH across reactive facies; letters designate significant differences (or not) between each facies, as evaluated by the post-hoc complement of a Kruskal-Wallis test.

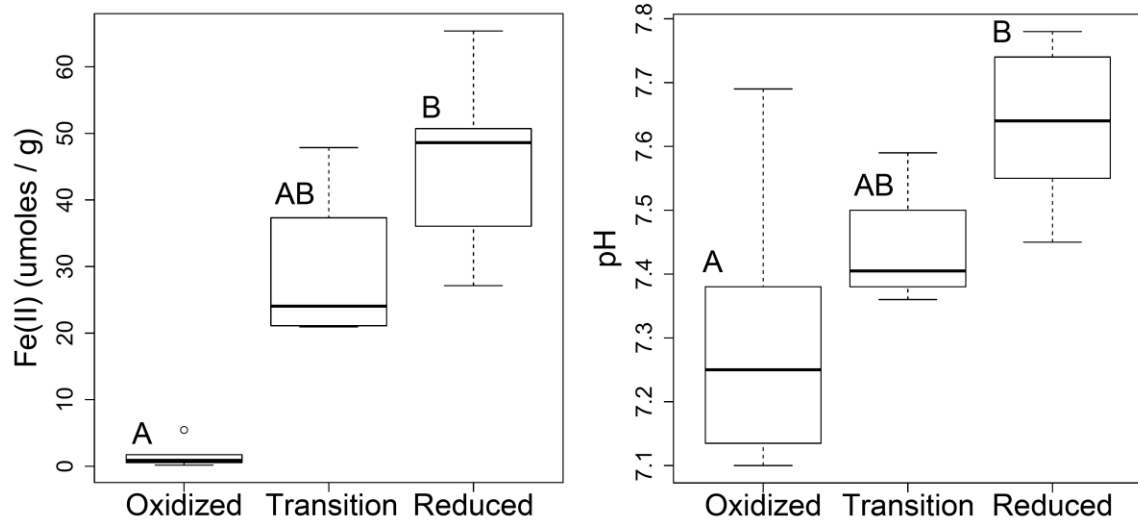

**Figure S3.** Boxplots of OTU richness across reactive facies; letters designate significant differences (or not) between each facies, as evaluated by the post-hoc complement of a Kruskal-Wallis test.

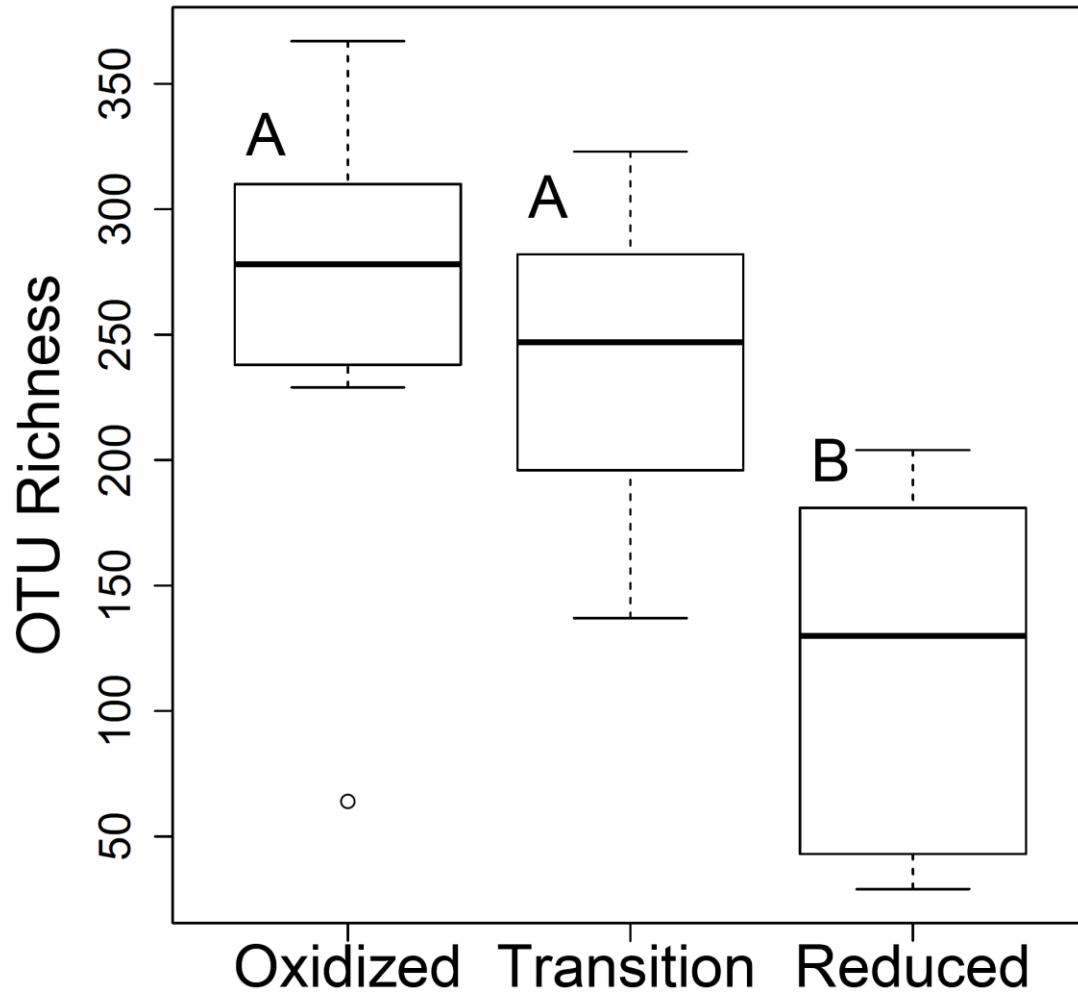

**Figure S4.** Significant relationships between OTU relative abundance and Fe(II) concentration. The Spearman Rank correlation was used due to non-linearity; 2545 OTUs were evaluated, so Bonferroni correction was used to evaluate significance; the corrected significance threshold was  $0.05 / 2545 = 1.96 \times 10^{-5}$ . Correlation statistics are provided on each panel. The phylum (“p\_”) and highest assigned taxonomic resolution are provided; “c\_” = class, “f\_” = family, “g\_” = genus. No species-level identifications were made.

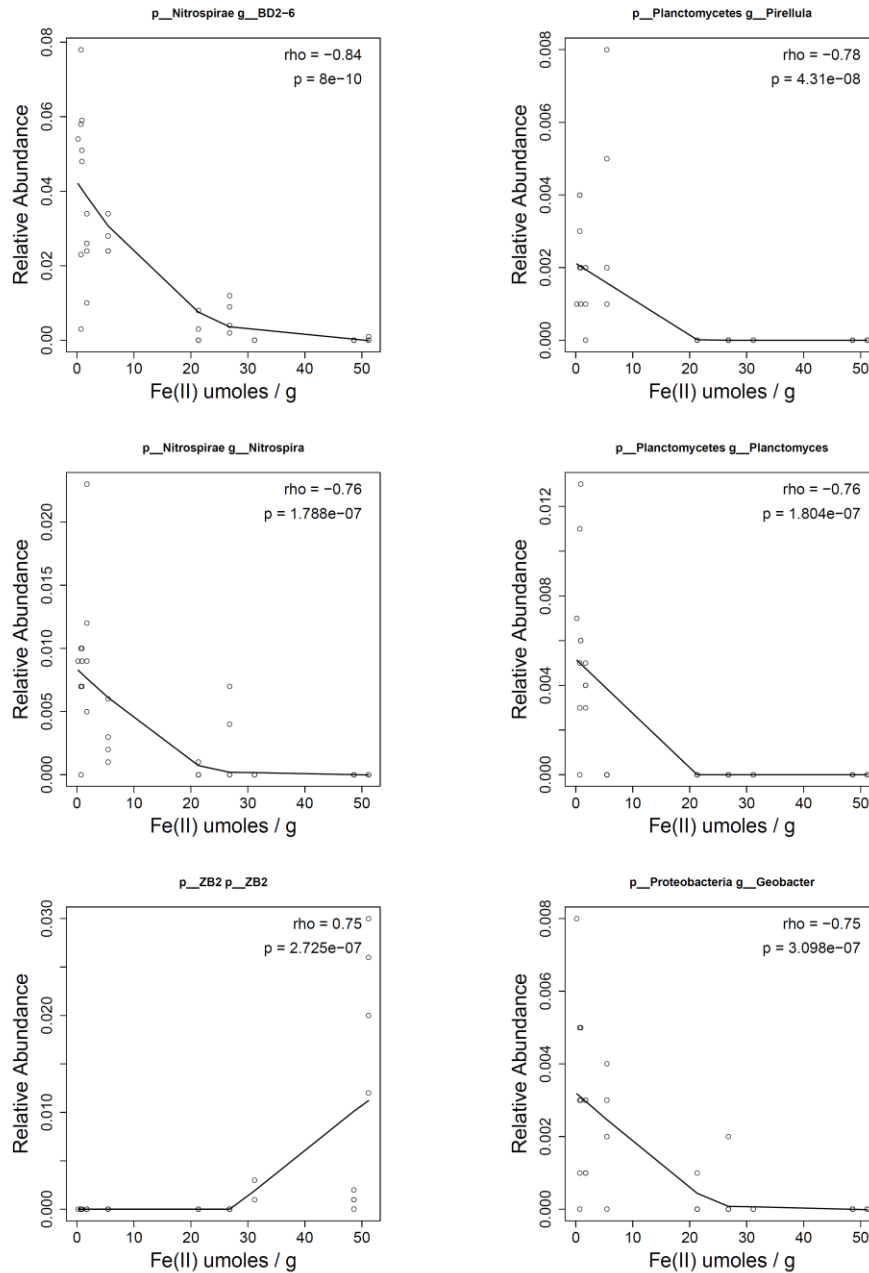

Figure S4 (cont).

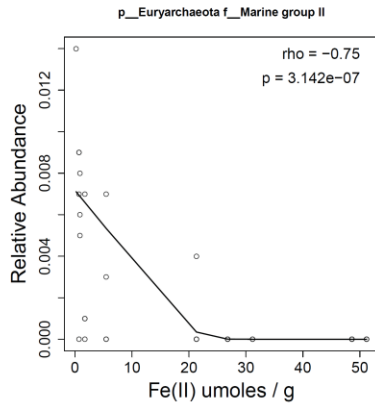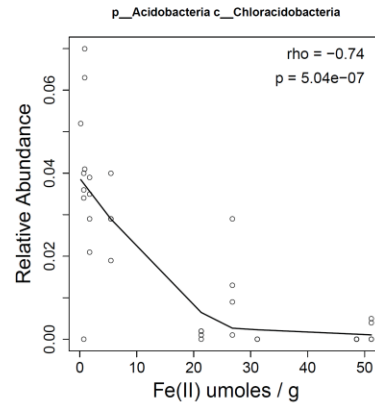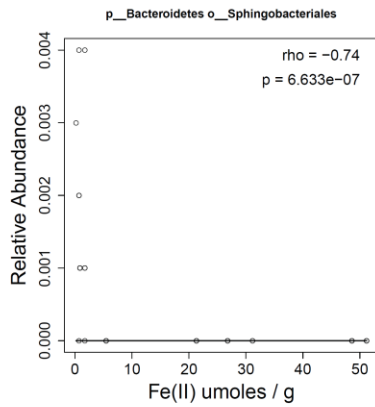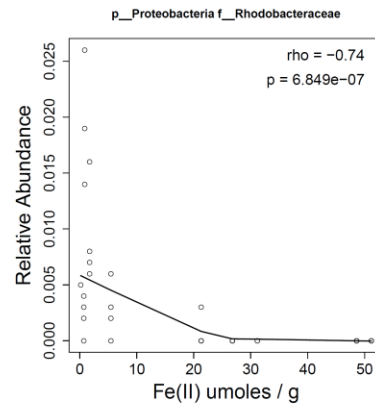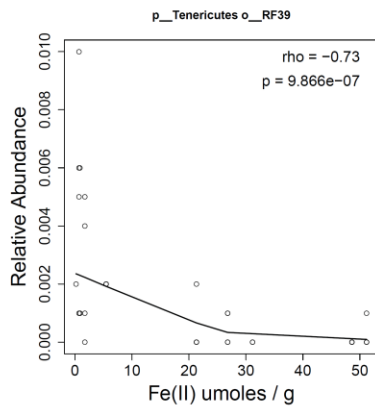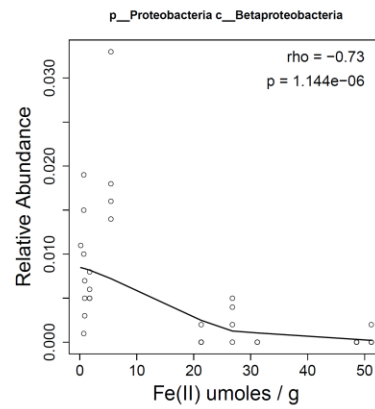



Figure S4 (cont).

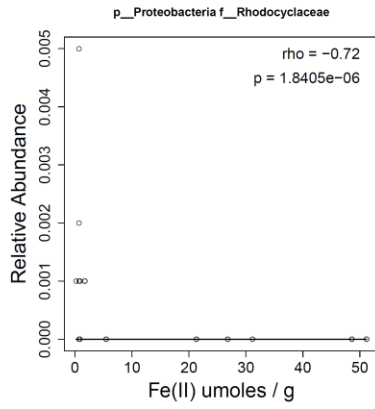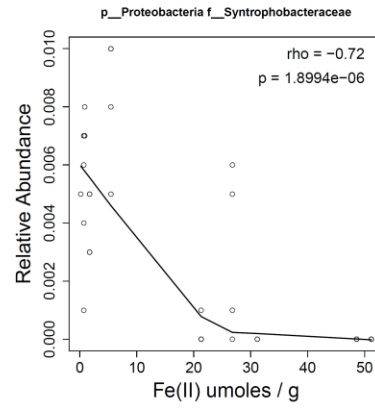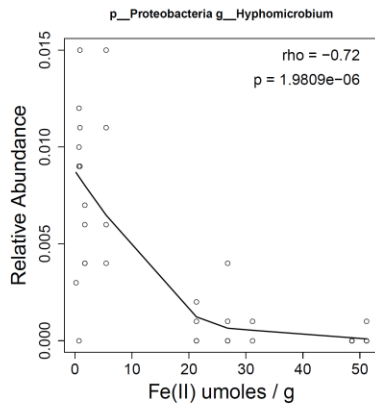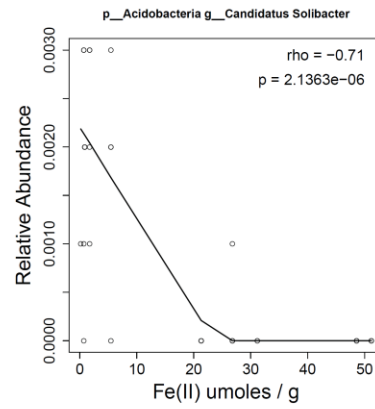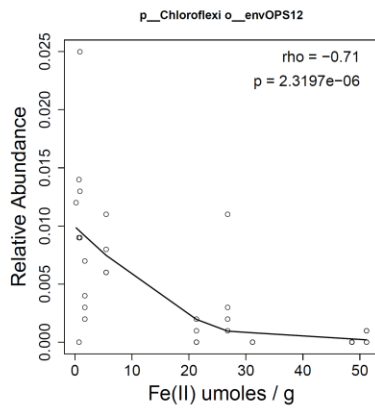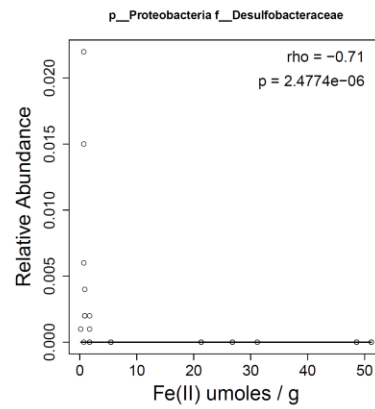

Figure S4 (cont).

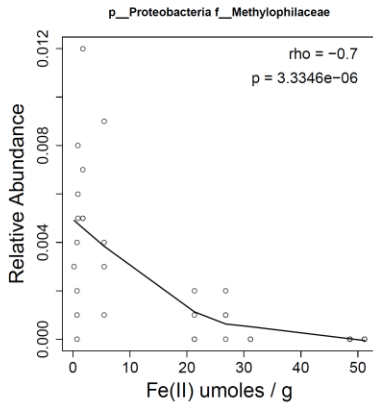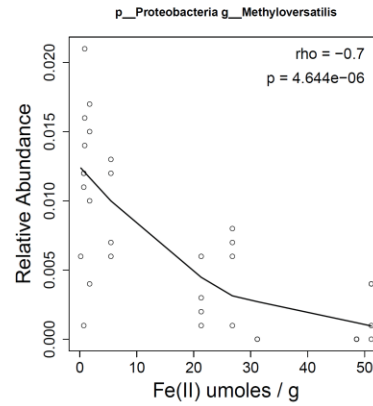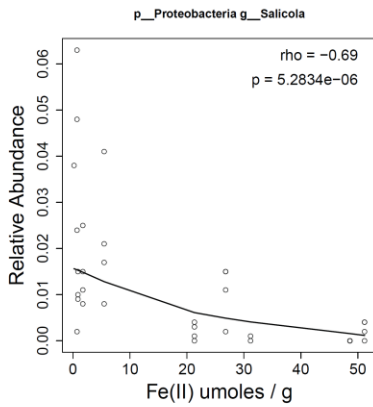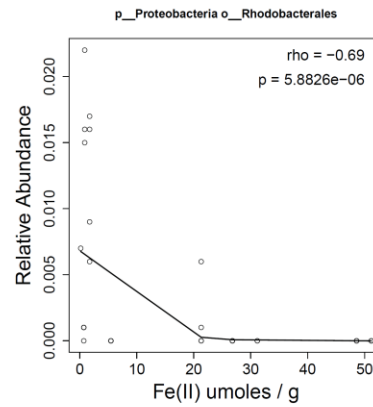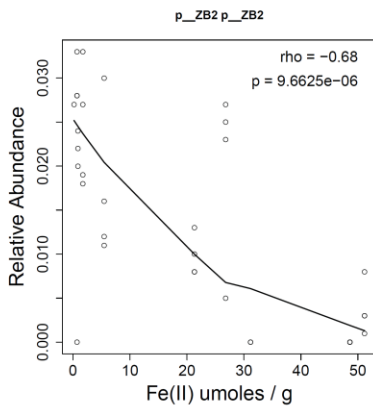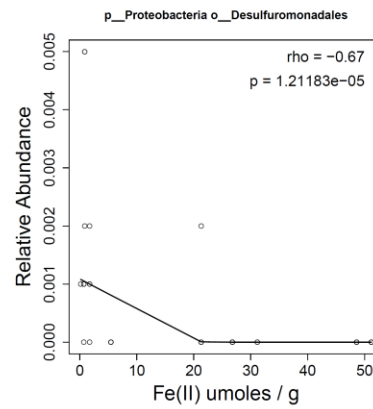

Figure S4 (cont).

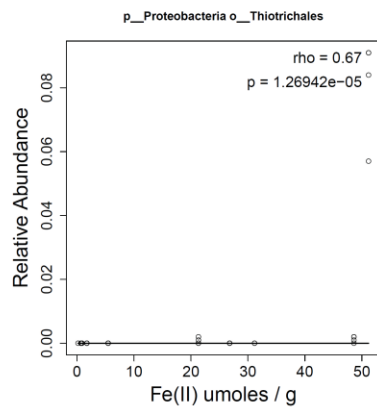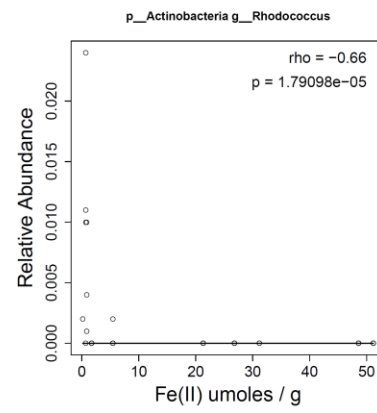

**Figure S5.** Vertical profiles—relative to the elevation of the transition reactive facies—of aqueous geochemical analytes from well C6199. Solid circles and 'x' symbols indicate values that were above or below the detection limit, respectively. The black and grey horizontal dashed lines indicate elevations of the Hanford-Ringold boundary and the transition reactive facies, respectively. The yellow box indicates the range of elevations (relative to the elevation of the transition reactive facies) for which microbial samples were analyzed from wells C7870 and C7867.

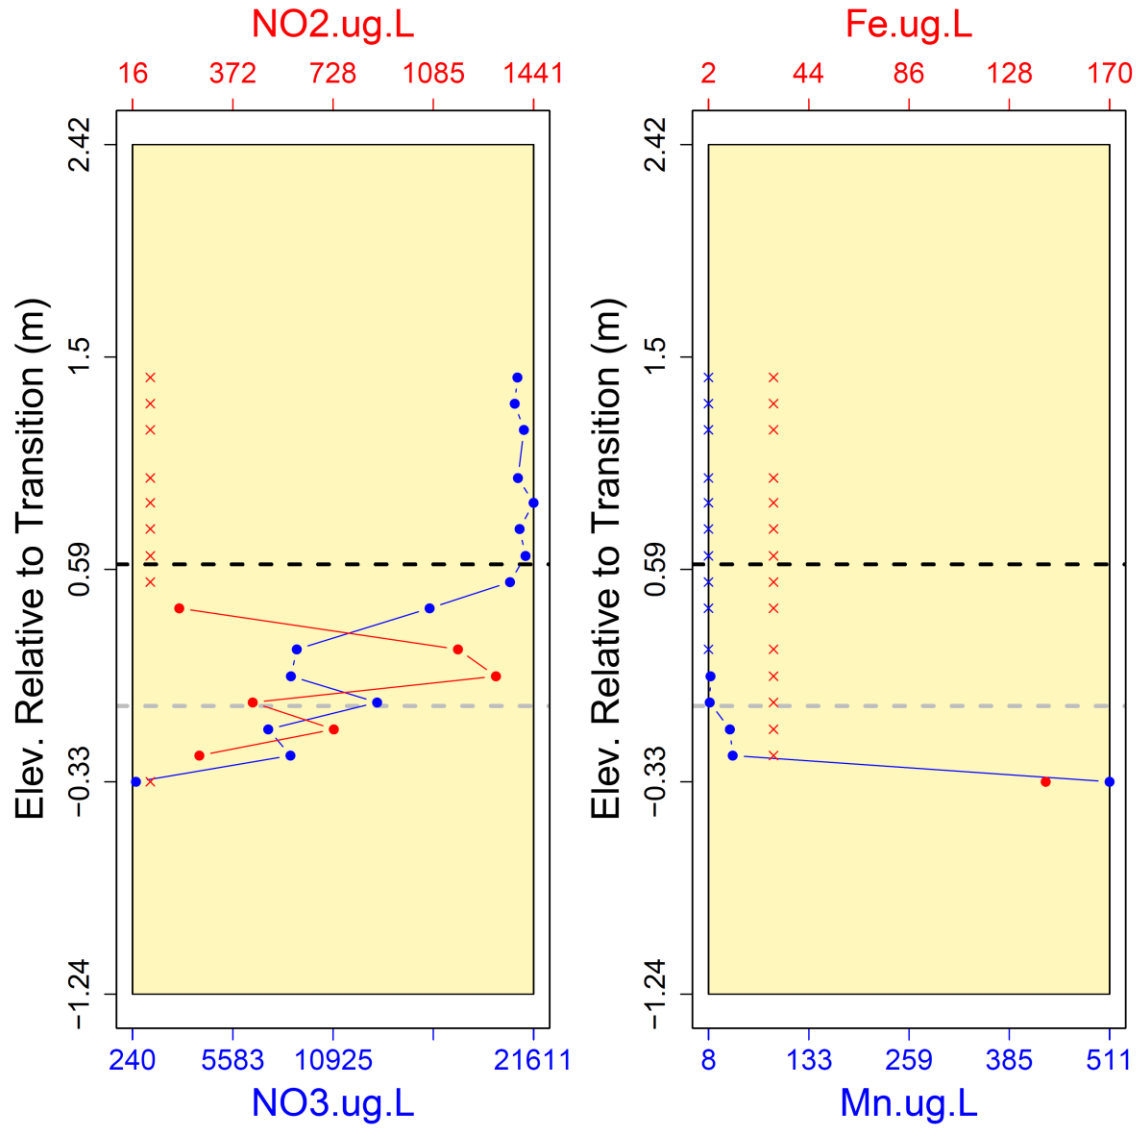

Supplement: srep30553-s1.pdf [file srep30553-s1.pdf]
